# Supplementary material for: PPARGC1α gene DNA methylation variations in human placenta mediate the link between maternal hyperglycemia and leptin levels in newborns
Source: Springer Nature journal article supplement (doi:10.1186/s13148-016-0239-9), 2016-06-22
Supplement: 13148_2016_239_MOESM1_ESM.pdf [file 13148_2016_239_MOESM1_ESM.pdf]

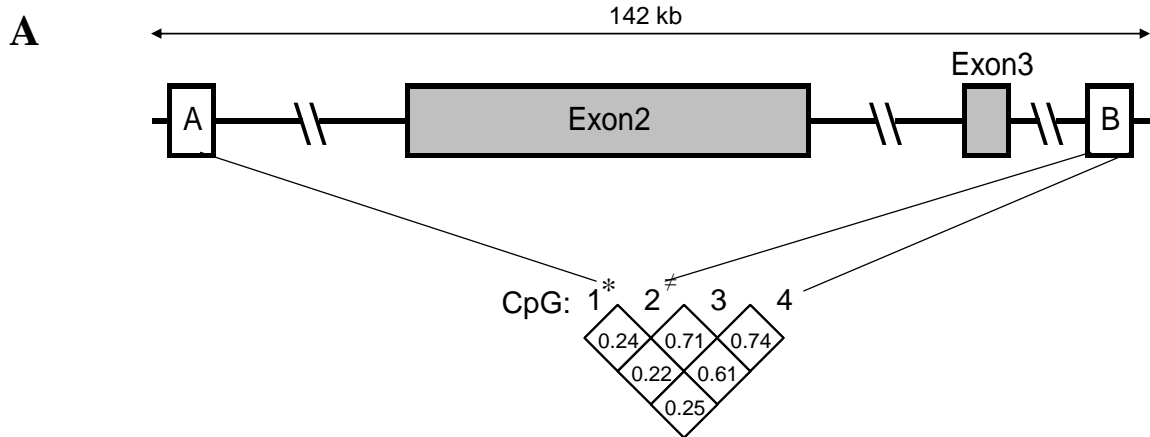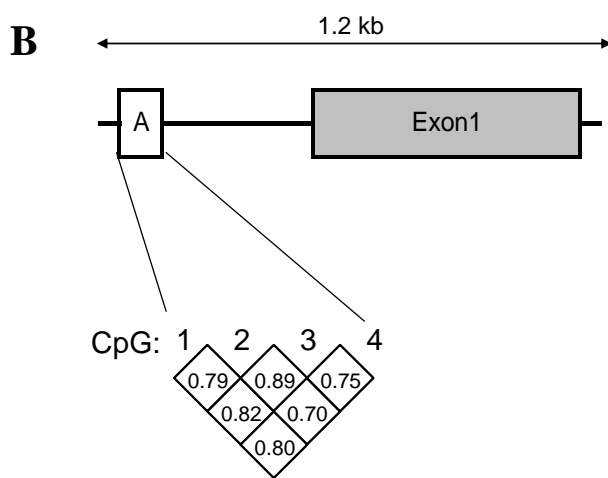

Mean DNA methylation:  $29.3 \pm 6.5\%$

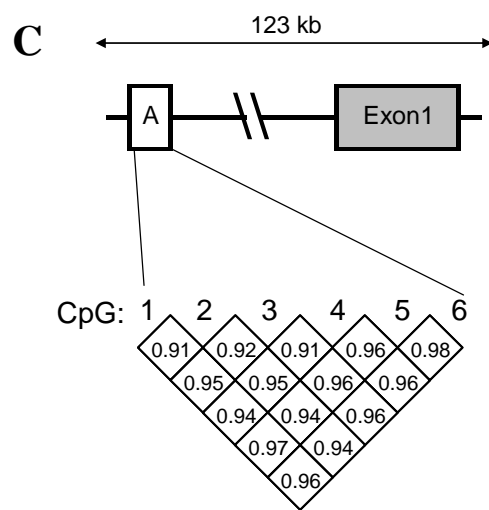

Mean DNA methylation:  $49.8 \pm 13.7\%$

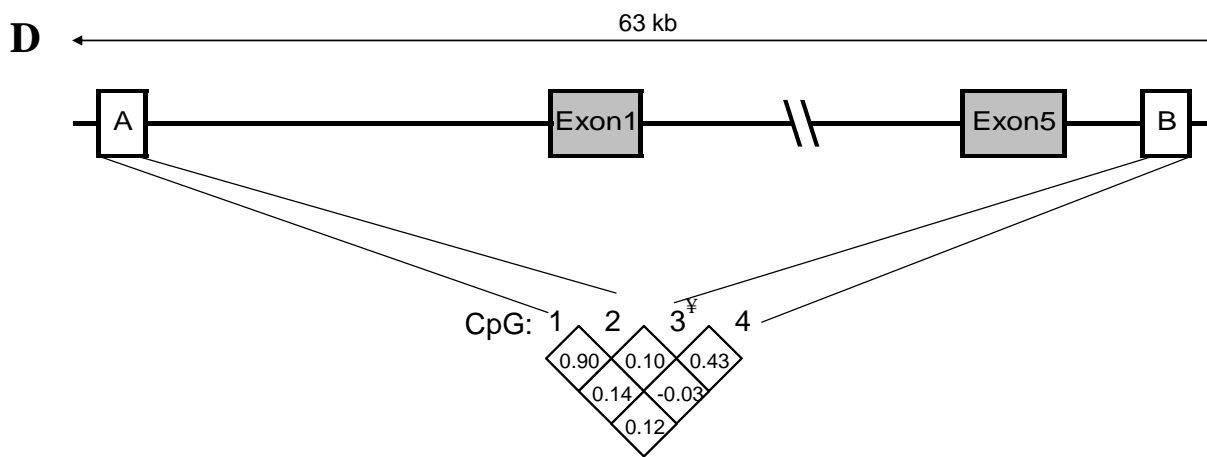

Mean DNA methylation CpG1 and CpG2 :  $11.7 \pm 7.6\%$

**Figure 1S. Loci analysed in E-21.** *PRDM16* (A), *BMP7* (B), *CTBP2* (C) and *PPARGC1 $\alpha$*  (D) genes CpGs epigenotyped are shown. The CpGs within *BMP7*-A, *CTBP2*-A and *PPARGC1 $\alpha$* -A locus were significantly well correlated with each other. For Gen3G, when the CpGs identified in E-21 was covered by 450k array probesets, the exact same CpGs were selected (\*cg01046951; <sup>#</sup>cg04873098; <sup>¥</sup>cg08550435). Since some CpGs were not covered by the 450k array, probesets covering variable CpGs in close vicinity to those identified in E-21 were selected. *PRDM16*: cg06814194 (1<sup>st</sup> intron) and cg23738647 (exon 6); *BMP7*: cg18759209 (proximal promoter); and *PPARGC1 $\alpha$* : cg11270806 and cg27514608 (both intron 5).
