# Supplementary material for: PPARGC1α gene DNA methylation variations in human placenta mediate the link between maternal hyperglycemia and leptin levels in newborns
Source: Clin Epigenetics. 2016 Jun 22;8:72. doi: 10.1186/s13148-016-0239-9 (PMC4918074; doi:10.1186/s13148-016-0239-9)
Supplement: Additional file 3: Table S2. — Spearman’s correlation coefficients between placental DNA methylation and metabolic variables of newborns in E-21 and Gen3G cohorts. (PDF 268 kb) [file 13148_2016_239_MOESM3_ESM.pdf]

**Table 2S. Spearman's correlation coefficients between placental DNA methylation and metabolic variables of newborns in E-21 and Gen3G cohorts**

| DNA methylation levels <sup>a</sup> | E-21 cohort                     |                                 | Gen3G cohort          |                        |
|-------------------------------------|---------------------------------|---------------------------------|-----------------------|------------------------|
|                                     | Leptin level<br>n=105           | Glucose level<br>n=74           | Leptin level<br>n=167 | Glucose level<br>n=168 |
| <i>PRDM16</i> -CpG1                 | r=-0.02<br>NS                   | r=-0.14<br>NS                   | r<-0.01<br>NS         | r=-0.05<br>NS          |
| <i>PRDM16</i> -CpG2                 | <b>r=-0.22</b><br><b>p=0.02</b> | <i>r=-0.19</i><br><i>p=0.09</i> | r<-0.01<br>NS         | r=0.11<br>NS           |
| <i>PRDM16</i> -CpG3                 | r=-0.14<br>p=0.14               | r=-0.13<br>NS                   | -<br>-                | -<br>-                 |
| <i>PRDM16</i> -CpG4                 | <b>r=-0.20</b><br><b>p=0.04</b> | <b>r=0.20</b><br><b>p=0.04</b>  | -<br>-                | -<br>-                 |
| Mean <i>BMP7</i>                    | r=-0.11<br>NS                   | r=-0.06<br>NS                   | r<-0.01<br>NS         | r=-0.04<br>NS          |
| Mean <i>CTBP2</i>                   | r=-0.16<br>NS                   | r=-0.11<br>NS                   | -<br>-                | -<br>-                 |
| Mean <i>PPARGC1α</i> -CpG1,2        | r=-0.12<br>NS                   | <b>r=0.25</b><br><b>p=0.04</b>  | -<br>-                | -<br>-                 |
| <i>PPARGC1α</i> -CpG3               | <b>r=0.20</b><br><b>p=0.04</b>  | <i>r=0.21</i><br><i>p=0.06</i>  | r=-0.06<br>NS         | r=0.12<br>p=0.12       |
| <i>PPARGC1α</i> -CpG4               | <i>r=0.18</i><br><i>p=0.07</i>  | r=-0.02<br>NS                   | -<br>-                | -<br>-                 |

<sup>a</sup>Residual scores of DNA methylation levels were used in the statistical models. They were obtained by using unstandardized analysis of residuals computed by linear regressions which included: gestational age, newborn's sex and weight, smoking during pregnancy, weight gain between 1<sup>st</sup> and 2<sup>nd</sup> trimester and maternal BMI at 1<sup>st</sup> trimester. Statistically significant results ( $p \leq 0.05$ ) are shown in bold, whereas statistical trends ( $p \leq 0.10$ ) are shown in italics. NS =  $p > 0.15$
